# Supplementary material
Source: publisher figshare collection journal article supplement (https://frontiersin.figshare.com/ndownloader/files/13245659)
Supplement: Supplementary file [file 13245659]

**Supplementary Table S1.** Statistics of *Solanum lycopersicum* genomic and non-genomic siRNAs in Tomato yellow leaf curl sardinia virus-infected and mock-inoculated plant tissues.

|                 |                                | Redundant  |                    |       | Unique     |                    |      |
|-----------------|--------------------------------|------------|--------------------|-------|------------|--------------------|------|
|                 |                                | # of Reads | miRNAs or v-siRNAs |       | # of Reads | miRNAs or v-siRNAs |      |
|                 |                                |            | # of reads         | %     |            | # of reads         | %    |
| Virus-infected  | Raw reads                      | 13231170   |                    |       |            |                    |      |
|                 | Adaptor removed                | 12103878   |                    |       |            |                    |      |
|                 | Filter by sequence properties  | 11961919   |                    |       | 2971654    |                    |      |
|                 | rRNA/tRNAexact matches removed | 1356860    |                    |       | 46244      |                    |      |
|                 | Matching with genome           | 8965078    | 2250590            | 25,10 | 2348893    | 251                | 0,01 |
|                 | Non-Matching with genome       | 1639981    | 710341             | 43.31 | 18863      | 18863              | 0,37 |
| Mock-inoculated | Raw reads                      | 4479742    |                    |       |            |                    |      |
|                 | Adaptor removed                | 4472405    |                    |       |            |                    |      |
|                 | Filter by sequence properties  | 4428916    |                    |       | 1643488    |                    |      |
|                 | rRNA/tRNAexact matches removed | 220998     |                    |       | 28454      |                    |      |
|                 | Matching with genome           | 3819266    | 516769             | 13,53 | 1349958    | 250                | 0,02 |
|                 | Non-Matching with genome       | 388652     | 71                 | 0,02  | 265076     | 69                 | 0,03 |
